# Supplementary material
Source: publisher site journal article supplement (https://www.spandidos-publications.com/4845/downloadSupplementary)

Figure S1. Effects of transfection with the pUC57 plasmid on the proliferation of NSCLC. BC, blank control (without pUC57 transfection); NC, negative control (with pUC57 transfection); ns, not significant.

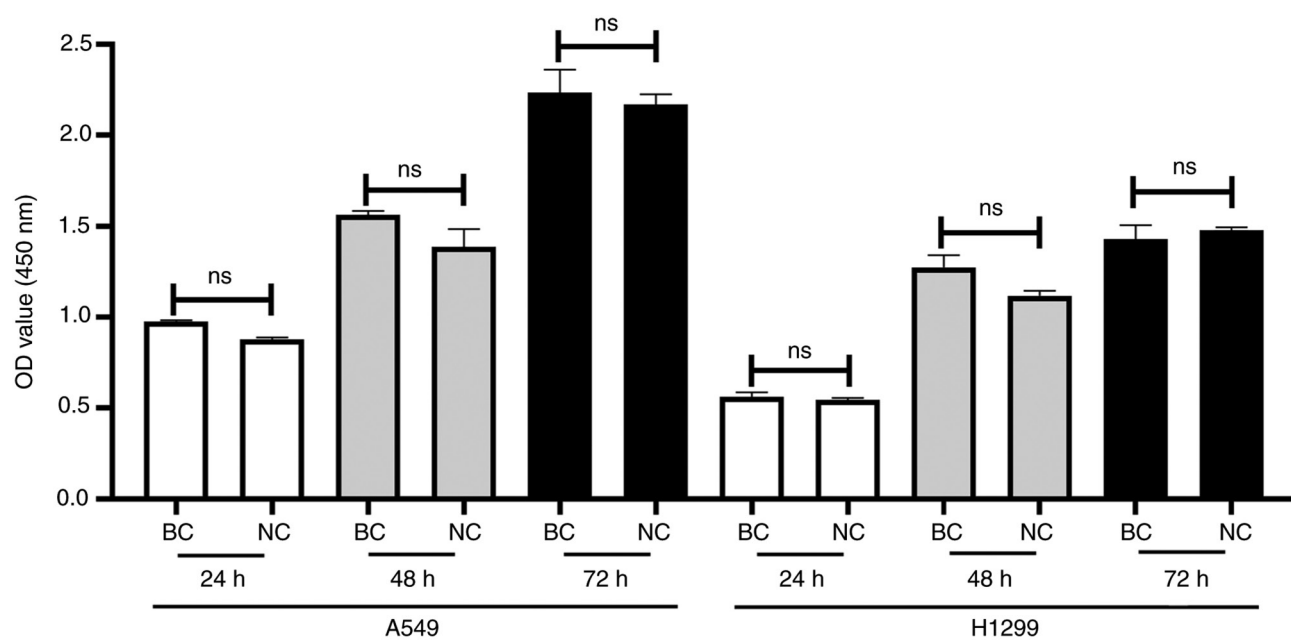

Supplement: Supplementary file 1 [file downloadSupplementary]
